# Supplementary material for: Heterogeneity of murine periosteum progenitors involved in fracture healing
Source: eLife. 2021 Feb 9;10:e58534. doi: 10.7554/eLife.58534 (PMC7906599; doi:10.7554/eLife.58534)
Supplement: Figure 1—source data 1. [file elife-58534-fig1-data1.xlsx]

## Sheet: Fig 1G
Figure 1							Values obtained from image analysis
aSMA Day 7 contribution to osteoblasts (Fig 1G)							No Tam Day 7	Sample	Cells analyzed	Col2.3GFP+	Tomato+	Dual colour	Col2.3GFP+ %	Tomato+ %	% osteoblasts that are Tom+
No Tam.	D+1	D0	D-14	D-45	D-90			1	9678	951	50	3	0.0982641	0.00516636	0.00315457
0.32	81.39	21.32	40.98	15.88	15.57			2	12657	1233	236	20	0.0974164	0.0186458	0.0162206
1.62	86.79	42.27	28.71	6.62	14.55			3	14636	1840	91	1	0.125717	0.00621755	0.000543478
0.05	76.33	58.21	54.5	18.74	41.39			30	26538	2351	230	3	0.0885899	0.00866682	0.00127605
0.13		45.14	45.37	17.92	27.95			31	11412	1737	140	7	0.152208	0.0122678	0.00402994
0.4		95.37	53.07	16.14	10.48			33	11989	1370	229	3	0.114271	0.0191008	0.00218978
0.22		81.29	12.51	31.75	26.09							Average	0.112745	0.0116775	0.00456907
					21.39
					25.18		Tam D+1, Day 7	68	23992	4690	16180	3817	0.195482	0.674391	0.813859
					9.17			69	7993	2240	6093	1944	0.280245	0.762292	0.867857
					2.51			71	33836	5623	19725	4292	0.166184	0.582959	0.763294
												Average	0.21397	0.673214	0.815003
Table Analyzed			Day 7 OB				Tam D0, Day 7	5	6333	699	1122	149	0.110374	0.177167	0.213162
Data sets analyzed			A-F					9	7061	2394	2233	1012	0.339045	0.316244	0.422723
								10	9513	1826	3662	1063	0.191948	0.384947	0.582147
ANOVA summary								11	9289	1799	2795	812	0.19367	0.300894	0.451362
F			19.2					64	10827	2246	8820	2142	0.207444	0.81463	0.953695
P value			<0.0001					65	8227	1101	5912	895	0.133828	0.718609	0.812897
P value summary			****									Average	0.196052	0.452082	0.572664
Significant diff. among means (P < 0.05)?			Yes
R square			0.7559				Tam D-14, Day 7	13	9106	1225	1790	502	0.134527	0.196574	0.409796
								14	8887	1247	2196	358	0.140317	0.247103	0.287089
Brown-Forsythe test								15	13431	1499	5057	817	0.111607	0.376517	0.54503
F (DFn, DFd)			4.121 (5, 31)					23	15561	1726	2877	783	0.110918	0.184885	0.45365
P value			0.0055					25	5980	2216	2132	1176	0.370569	0.356522	0.530686
P value summary			**					58	36742	4659	2955	583	0.126803	0.0804257	0.125134
Are SDs significantly different (P < 0.05)?			Yes									Average	0.16579	0.240338	0.391898
Dunnett's multiple comparisons test		Mean Diff.	95.00% CI of diff.	Significant?	Summary		Tam D-45, Day 7	39	6485	655	399	104	0.101002	0.0615266	0.158779
No Tam. vs. D+1		-81.05	-108.3 to -53.83	Yes	****			42	8006	1073	190	71	0.134024	0.0237322	0.0661696
No Tam. vs. D0		-56.81	-79.03 to -34.59	Yes	****			44	12657	971	824	182	0.0767164	0.0651023	0.187436
No Tam. vs. D-14		-38.73	-60.96 to -16.51	Yes	***			53	41437	597	2930	107	0.0144074	0.0707098	0.179229
No Tam. vs. D-45		-17.27	-39.49 to 4.951	No	ns			54	19147	2150	1498	347	0.112289	0.0782368	0.161395
No Tam. vs. D-90		-18.97	-38.85 to 0.9049	No	ns			55	42912	3471	6488	1102	0.0808865	0.151193	0.317488
												Average	0.0865544	0.0750835	0.178416
Table Analyzed			Day 7 OB				Tam D-90, Day 7	74	17017	2184	1382	340	0.128342	0.0812129	0.155678
Data sets analyzed			B-F					75	9234	1595	979	232	0.172731	0.106021	0.145455
								76	70064	935	11425	387	0.0133449	0.163065	0.413904
ANOVA summary								81	13453	2218	4307	620	0.16487	0.320152	0.279531
F			13.7					82	30696	821	2179	86	0.0267462	0.0709864	0.10475
P value			<0.0001					83	3342	552	502	144	0.165171	0.150209	0.26087
P value summary			****					84	9618	2029	1623	434	0.210959	0.168746	0.213898
Significant diff. among means (P < 0.05)?			Yes					85	7108	1521	1020	383	0.213984	0.1435	0.251808
R square			0.6783					87	3652	1308	334	120	0.35816	0.0914567	0.0917431
								88	9151	838	317	21	0.0915747	0.034641	0.0250597
Brown-Forsythe test												Average	0.154588	0.132999	0.19427
F (DFn, DFd)			2.852 (4, 26)
P value			0.0439
P value summary			*
Are SDs significantly different (P < 0.05)?			Yes
Dunnett's multiple comparisons test		Mean Diff.	95.00% CI of diff.	Significant?	Summary
D0 vs. D+1		-24.24	-53.38 to 4.906	No	ns
D0 vs. D-14		18.08	-5.718 to 41.87	No	ns
D0 vs. D-45		39.54	15.74 to 63.33	Yes	***
D0 vs. D-90		37.84	16.56 to 59.12	Yes	***

## Sheet: Fig 1H
							Values obtained from image analysis
aSMA Day 14 contribution to osteoblasts (Fig 1H)							No Tam Day 14	Sample	Cells analyzed	Col2.3GFP+	Tomato+	Dual colour	Col2.3GFP+ %	Tomato+ %	% osteoblasts that are Tom+
No Tam.	D0	D-14	D-45					34	14506	5032	212	74	0.346891	0.0146146	0.0147059
1.47	66.9	25.24	24.85					35	7976	2065	88	23	0.258902	0.0110331	0.011138
1.11	75.88	21.88	18.01					36	9000	1815	100	36	0.201667	0.0111111	0.0198347
1.98	69.15	22.7	13.8					37	13403	3924	123	38	0.29277	0.00917705	0.009684
0.97	27.7	40.13	19.56					38	8754	3661	99	53	0.418209	0.0113091	0.0144769
1.45	56.36	64.26	14.26									Average	0.303688	0.011449	0.0139679
		26.95	42.26
			10.29				Tam D0, Day 14	51	15205	6454	7897	4318	0.424466	0.519369	0.669042
								52	18895	2152	9099	1633	0.113893	0.481556	0.758829
								60	6850	2661	3331	1840	0.388467	0.486277	0.691469
								61	3646	881	501	244	0.241635	0.137411	0.276958
								67	14496	3036	5686	1711	0.209437	0.392246	0.56357
												Average	0.275579	0.403372	0.591974
Table Analyzed			Day 14 OB
Data sets analyzed			A-D				Tam D-14, Day 14	17	5983	1125	801	284	0.188033	0.133879	0.252444
								18	8024	2303	1249	504	0.287014	0.155658	0.218845
ANOVA summary								20	8990	3951	1453	897	0.439488	0.161624	0.227031
F			16.37					26	4322	1109	975	445	0.256594	0.22559	0.401262
P value			<0.0001					27	6055	2219	2743	1426	0.366474	0.453014	0.642632
P value summary			****					28	7557	1978	927	533	0.261744	0.122668	0.269464
Significant diff. among means (P < 0.05)?			Yes									Average	0.299891	0.208739	0.33528
R square			0.721
							Tam D-45, Day 14	46	7981	1195	1311	297	0.149731	0.164265	0.248536
Brown-Forsythe test								47	8685	2154	726	388	0.248014	0.0835924	0.18013
F (DFn, DFd)			1.089 (3, 19)					48	7971	1420	423	196	0.178146	0.0530674	0.138028
P value			0.3779					50	5322	2250	725	440	0.422773	0.136227	0.195556
P value summary			ns					45	8326	1683	656	240	0.202138	0.0787893	0.142602
Are SDs significantly different (P < 0.05)?			No					56	14541	1143	3273	483	0.0786053	0.225088	0.422572
								57	30967	4304	1633	443	0.138987	0.0527336	0.102928
Dunnett's multiple comparisons test		Mean Diff.	95.00% CI of diff.	Significant?	Summary							Average	0.202628	0.113395	0.204336
No Tam. vs. D0		-57.8	-79.54 to -36.07	Yes	****
No Tam. vs. D-14		-32.13	-52.94 to -11.32	Yes	**
No Tam. vs. D-45		-19.04	-39.16 to 1.087	No	ns
Table Analyzed			Day 14 OB
Data sets analyzed			B-D
ANOVA summary
F			9.534
P value			0.0021
P value summary			**
Significant diff. among means (P < 0.05)?			Yes
R square			0.5597
Brown-Forsythe test
F (DFn, DFd)			0.2673 (2, 15)
P value			0.769
P value summary			ns
Are SDs significantly different (P < 0.05)?			No
Dunnett's multiple comparisons test		Mean Diff.	95.00% CI of diff.	Significant?	Summary
D0 vs. D-14		25.67	3.283 to 48.06	Yes	*
D0 vs. D-45		38.77	17.12 to 60.41	Yes	**

## Sheet: Fig 1I
aSMA Day 7 chondrocyte contribution							Values obtained from image analysis
No Tam.	D+1	D0	D-14	D-45	D-90		No Tam Day 7	Sample	Cells analyzed	Sox9+	Tomato+	Dual colour	Sox9+ %	Tomato+ %	% chondrocytes that are Tom+
0.37	45.63	17.38	21.98	1.93	13.46			1	2335	1915	7	7	0.820128	0.00299786	0.00365535
1.63	32.74	34.68	18.83	19.17	32.52			3	1156	674	15	11	0.583045	0.0129758	0.0163205
0.72	54.23	13.37	33.48	5.91	11.31			4	561	414	3	3	0.737968	0.00534759	0.00724638
1.82		19.78	35.23	0.51	38.49			30	611	385	10	7	0.630115	0.0163666	0.0181818
0.32		60.13	35.74	7.27	7.03			31	592	311	5	1	0.525338	0.00844595	0.00321543
1.23		65.77	19.84	16.95	2.02			33	580	488	10	6	0.841379	0.0172414	0.0122951
				7.42								Average	0.689662	0.0105625	0.0101524
				12.25
				21.95			Tam D+1, Day 7	68	3746	2424	1622	1106	0.64709	0.432995	0.456271
								69	631	391	185	128	0.619651	0.293185	0.327366
Table Analyzed			Day 7 Chondrocytes					71	4598	3369	2365	1827	0.73271	0.514354	0.542297
Data sets analyzed			A-F									Average	0.666484	0.413512	0.441978
ANOVA summary							Tam D0, Day 7	5	565	443	98	77	0.784071	0.173451	0.173815
F			8.338					7	2901	891	1199	309	0.307135	0.413306	0.346801
P value			<0.0001					10	562	389	95	52	0.692171	0.169039	0.133676
P value summary			****					11	473	364	126	72	0.769556	0.266385	0.197802
Significant diff. among means (P < 0.05)?			Yes					13	703	455	117	100	0.647226	0.16643	0.21978
R square			0.5815					64	2637	1392	1586	837	0.527873	0.601441	0.601293
								65	4416	3076	2894	2023	0.696558	0.655344	0.657672
Brown-Forsythe test												Average	0.632084	0.349342	0.332977
F (DFn, DFd)			3.523 (5, 30)
P value			0.0127				Tam D-14, Day 7	14	718	478	148	90	0.665738	0.206128	0.188285
P value summary			*					23	1318	1111	453	372	0.842944	0.343703	0.334833
Are SDs significantly different (P < 0.05)?			Yes					24	712	633	251	223	0.889045	0.352528	0.352291
								25	1245	999	448	357	0.80241	0.359839	0.357357
Dunnett's multiple comparisons test		Mean Diff.	95.00% CI of diff.	Significant?	Summary			58	2840	2551	564	506	0.898239	0.198592	0.198354
No Tam. vs. D+1		-43.19	-66.71 to -19.66	Yes	***								0.819675	0.292158	0.286224
No Tam. vs. D0		-34.17	-53.37 to -14.97	Yes	***
No Tam. vs. D-14		-26.5	-45.71 to -7.297	Yes	**		Tam D-45, Day 7	39	906	622	36	12	0.686534	0.0397351	0.0192926
No Tam. vs. D-45		-9.358	-26.89 to 8.173	No	ns			40	616	480	117	92	0.779221	0.189935	0.191667
No Tam. vs. D-90		-16.46	-35.66 to 2.748	No	ns			41	1512	1236	94	73	0.81746	0.0621693	0.0590615
								42	277	198	3	1	0.714801	0.0108303	0.00505051
								43	1489	1196	125	87	0.803224	0.083949	0.0727425
Table Analyzed			Day 7 Chondrocytes					44	568	413	91	70	0.727113	0.160211	0.169492
Data sets analyzed			B-F					53	1669	1469	130	109	0.880168	0.077891	0.0742001
								54	2328	2122	280	260	0.911512	0.120275	0.122526
ANOVA summary								55	5920	4884	1244	1072	0.825	0.210135	0.219492
F			5.296										0.793893	0.106126	0.103725
P value			0.0031
P value summary			**				Tam D-90, Day 7	76	17662	8943	2482	1204	0.506341	0.140528	0.13463
Significant diff. among means (P < 0.05)?			Yes					81	5063	3748	1607	1219	0.740273	0.317401	0.32524
R square			0.4587					82	13221	9623	1340	1088	0.727857	0.101354	0.113062
								84	1546	491	513	189	0.317594	0.331824	0.384929
Brown-Forsythe test								85	2833	754	218	53	0.266149	0.0769502	0.0702918
F (DFn, DFd)			2.178 (4, 25)					88	2714	1237	71	25	0.455785	0.0261606	0.0202102
P value			0.1008										0.502333	0.165703	0.174727
P value summary			ns
Are SDs significantly different (P < 0.05)?			No
Dunnett's multiple comparisons test		Mean Diff.	95.00% CI of diff.	Significant?	Summary
D0 vs. D+1		-9.015	-34.30 to 16.27	No	ns
D0 vs. D-14		7.668	-12.98 to 28.31	No	ns
D0 vs. D-45		24.81	5.966 to 43.66	Yes	**
D0 vs. D-90		17.71	-2.931 to 38.36	No	ns

## Sheet: Fig 1 S3B
aSMA Day 7 contribution to osteoblasts in endosteal space
No Tam.	D+1	D0	D-14	D-45	D-90
1.05	92.48	48.58	2.12	1.53	19.27
0.34	95.34	47.47	4.21	0.61	4.73
0.17		43.01	43.91	1.15	18.71
0.21			5.39	1.75	10.03
0.11			6.85	0.6	2.45
0.15
Table Analyzed		Day 7 Endo OB
Data sets analyzed		A-F
ANOVA summary
F		46.67
P value		<0.0001
P value summary		****
Significant diff. among means (P < 0.05)?		Yes
R square		0.9211
Brown-Forsythe test
F (DFn, DFd)		1.057 (5, 20)
P value		0.4127
P value summary		ns
Are SDs significantly different (P < 0.05)?		No
Dunnett's multiple comparisons test		Mean Diff.	95.00% CI of diff.	Significant?	Summary
No Tam. vs. D+1		-93.57	-113.2 to -73.92	Yes	****
No Tam. vs. D0		-46.02	-63.03 to -29.00	Yes	****
No Tam. vs. D-14		-12.16	-26.73 to 2.413	No	ns
No Tam. vs. D-45		-0.7897	-15.36 to 13.78	No	ns
No Tam. vs. D-90		-10.7	-25.27 to 3.871	No	ns
Table Analyzed		Day 7 Endo OB
Data sets analyzed		B-F
ANOVA summary
F		38.13
P value		<0.0001
P value summary		****
Significant diff. among means (P < 0.05)?		Yes
R square		0.9105
Brown-Forsythe test
F (DFn, DFd)		0.7442 (4, 15)
P value		0.5767
P value summary		ns
Are SDs significantly different (P < 0.05)?		No
Dunnett's multiple comparisons test		Mean Diff.	95.00% CI of diff.	Significant?	Summary
D0 vs. D+1		-47.56	-72.30 to -22.81	Yes	***
D0 vs. D-14		33.86	14.06 to 53.65	Yes	**
D0 vs. D-45		45.23	25.43 to 65.02	Yes	****
D0 vs. D-90		35.32	15.52 to 55.11	Yes	***

## Sheet: Fig 1 S3C
aSMA Day 14 contribution to osteoblasts in endosteal space
No Tam.	D0	D-14	D-45
0.95	81.2	4.04	5.18
0.98	66.08	2.59	3.4
0.49	74.52	5.96	3.47
2.71		19.85	3.94
0.4	57.35	47.56	8.56
		2.81	2.21
			18.42
Table Analyzed		Day 14 Endo OB
Data sets analyzed		A-D
ANOVA summary
F		37.73
P value		<0.0001
P value summary		****
Significant diff. among means (P < 0.05)?		Yes
R square		0.8628
Brown-Forsythe test
F (DFn, DFd)		1.293 (3, 18)
P value		0.3073
P value summary		ns
Are SDs significantly different (P < 0.05)?		No
Dunnett's multiple comparisons test		Mean Diff.	95.00% CI of diff.	Significant?	Summary
No Tam. vs. D0		-68.68	-87.19 to -50.17	Yes	****
No Tam. vs. D-14		-12.7	-29.41 to 4.015	No	ns
No Tam. vs. D-45		-5.348	-21.51 to 10.81	No	ns
Table Analyzed		Day 14 Endo OB
Data sets analyzed		B-D
ANOVA summary
F		37.35
P value		<0.0001
P value summary		****
Significant diff. among means (P < 0.05)?		Yes
R square		0.8422
Brown-Forsythe test
F (DFn, DFd)		0.7984 (2, 14)
P value		0.4695
P value summary		ns
Are SDs significantly different (P < 0.05)?		No
Dunnett's multiple comparisons test		Mean Diff.	95.00% CI of diff.	Significant?	Summary
D0 vs. D-14		55.99	36.77 to 75.20	Yes	****
D0 vs. D-45		63.33	44.68 to 81.99	Yes	****
