# Supplementary material for: Heterogeneity of murine periosteum progenitors involved in fracture healing
Source: eLife. 2021 Feb 9;10:e58534. doi: 10.7554/eLife.58534 (PMC7906599; doi:10.7554/eLife.58534)
Supplement: Figure 2—source data 1. [file elife-58534-fig2-data1.xlsx]

## Sheet: Figure 2A
Figure 2A	Marker expression in CD45/Ter119/CD31- populations in each tissue
	Periosteum			Endosteum			Bone marrow
	Mean (%)	SD	n	Mean	SD	n	Mean	SD	n
Sca1	22.9	12.7	46	1.3	1.5	42	0.1	0.1	31
CD51	40.1	23.3	50	13.7	10.4	46	5.3	3.1	35
CD105	22.8	14.9	48	55.8	14.8	44	62.72	23	29
CD90	37.4	15.2	50	3.9	4.3	46	0.7	1.3	31
PDGFRα	23.6	9.9	8	0.8	0.7	8	0.6	0.2	8
PDGFRβ	21.1	5.4	4	0.1	0.1	4	0.3	0.2	4
CD200	30.7	13.5	8	6.3	2.2	8	3.9	3.1	12
All bone marrow samples have corresponding periosteum samples, however bone marrow was not analyzed in all experiments
Statistical Analysis
Table Analyzed	Marker expression in different tissues
Two-way ANOVA	Ordinary
Alpha	0.05
Source of Variation	% of total variation	P value	P value summary	Significant?
Interaction	31.9	<0.0001	****	Yes
Marker	36.33	<0.0001	****	Yes
Cell type	5.444	<0.0001	****	Yes
ANOVA table	SS (Type III)	DF	MS	F (DFn, DFd)	P value
Interaction	97987	12	8166	F (12, 541) = 50.08	P<0.0001
Marker	111583	6	18597	F (6, 541) = 114.1	P<0.0001
Cell type	16721	2	8361	F (2, 541) = 51.28	P<0.0001
Residual	88208	541	163
Within each row, compare columns (simple effects within rows)
Number of families	7
Number of comparisons per family	3
Alpha	0.05
Tukey's multiple comparisons test	Predicted (LS) mean diff.	95.00% CI of diff.	Significant?	Summary	Adjusted P Value
Sca1
Periosteum vs. Endosteum	21.6	15.20 to 28.00	Yes	****	<0.0001
Periosteum vs. Bone marrow	22.8	15.83 to 29.77	Yes	****	<0.0001
Endosteum vs. Bone marrow	1.2	-5.906 to 8.306	No	ns	0.9169
CD51
Periosteum vs. Endosteum	26.4	20.27 to 32.53	Yes	****	<0.0001
Periosteum vs. Bone marrow	34.8	28.19 to 41.41	Yes	****	<0.0001
Endosteum vs. Bone marrow	8.4	1.669 to 15.13	Yes	**	0.0098
CD105
Periosteum vs. Endosteum	-33	-39.26 to -26.74	Yes	****	<0.0001
Periosteum vs. Bone marrow	-39.92	-46.98 to -32.86	Yes	****	<0.0001
Endosteum vs. Bone marrow	-6.92	-14.10 to 0.2578	No	ns	0.0616
CD90
Periosteum vs. Endosteum	33.5	27.37 to 39.63	Yes	****	<0.0001
Periosteum vs. Bone marrow	36.7	29.84 to 43.56	Yes	****	<0.0001
Endosteum vs. Bone marrow	3.2	-3.773 to 10.17	No	ns	0.5279
PDGFRα
Periosteum vs. Endosteum	22.8	7.795 to 37.80	Yes	**	0.0011
Periosteum vs. Bone marrow	23	7.995 to 38.00	Yes	**	0.001
Endosteum vs. Bone marrow	0.2	-14.80 to 15.20	No	ns	0.9995
PDGFRβ
Periosteum vs. Endosteum	21	-0.2198 to 42.22	No	ns	0.0531
Periosteum vs. Bone marrow	20.8	-0.4198 to 42.02	No	ns	0.0561
Endosteum vs. Bone marrow	-0.2	-21.42 to 21.02	No	ns	0.9997
CD200
Periosteum vs. Endosteum	24.4	9.395 to 39.40	Yes	***	0.0004
Periosteum vs. Bone marrow	26.8	13.10 to 40.50	Yes	****	<0.0001
Endosteum vs. Bone marrow	2.4	-11.30 to 16.10	No	ns	0.9108

## Sheet: Figure 2D
Figure 2D - SMA-Tom+ cells in CD45- population (%)
Periosteum	Endosteum	Bone marrow
1.66	0.02	0
1.27	0.15	0
1.09	0.28	0
2.27	0.28	0
5.4	0.12	0
3.3	0.07	0
4.5	0.13	0
2.3	0.83	1.19e-05
1.8	0.31	8.86e-06
7.12	1.16	0
6.36	1.37	0
16.2	0.24	0
7.85	0.79	0
6.49	0.77	0
5.94	1.71	0
3.03	0.15	0
2.11	0.12	0

## Sheet: Figure 2E
Marker expression (%) in CD45- SMA-Tom+ population
	Periosteum
		CD45-			Tom+ Day 2			T-test
		Mean	SD	n	Mean	SD	n	P value
	Sca1	28.7	12.6	17	26.14	9.53	17	0.5158
	CD51	52.2	11.5	13	72.12	11.88	13	0.0002
	CD105	9.9	7.3	11	12.32	8.45	11	0.4719
	CD90	26.1	16	13	56.2	12.44	13	<0.0001
	PDGFRα	21.5	9.4	13	29.34	9.35	13	0.0427
	PDGFRβ	21.1	5.4	4	34	2.8	4	0.0056
t-tests were performed separately for each marker
Table Analyzed	Sca1
Column B	Tom+ Day 2
vs.	vs.
Column A	CD45-
Unpaired t test
P value	0.5158
P value summary	ns
Significantly different (P < 0.05)?	No
One- or two-tailed P value?	Two-tailed
t, df	t=0.6571, df=32
How big is the difference?
Mean of column A	28.66
Mean of column B	26.14
Difference between means (B - A) ± SEM	-2.524 ± 3.840
95% confidence interval	-10.35 to 5.299
R squared (eta squared)	0.01331
F test to compare variances
F, DFn, Dfd	1.759, 16, 16
P value	0.2693
P value summary	ns
Significantly different (P < 0.05)?	No
Table Analyzed	CD51
Column B	Tom+ Day 2
vs.	vs.
Column A	CD45-
Unpaired t test
P value	0.0002
P value summary	***
Significantly different (P < 0.05)?	Yes
One- or two-tailed P value?	Two-tailed
t, df	t=4.327, df=24
How big is the difference?
Mean of column A	52.24
Mean of column B	72.12
Difference between means (B - A) ± SEM	19.88 ± 4.594
95% confidence interval	10.40 to 29.36
R squared (eta squared)	0.4382
F test to compare variances
F, DFn, Dfd	1.059, 12, 12
P value	0.9226
P value summary	ns
Significantly different (P < 0.05)?	No
Table Analyzed	CD105
Column B	Tom+ Day 2
vs.	vs.
Column A	CD45-
Unpaired t test
P value	0.4719
P value summary	ns
Significantly different (P < 0.05)?	No
One- or two-tailed P value?	Two-tailed
t, df	t=0.7333, df=20
How big is the difference?
Mean of column A	9.852
Mean of column B	12.32
Difference between means (B - A) ± SEM	2.464 ± 3.359
95% confidence interval	-4.544 to 9.471
R squared (eta squared)	0.02619
F test to compare variances
F, DFn, Dfd	1.354, 10, 10
P value	0.6412
P value summary	ns
Significantly different (P < 0.05)?	No
Table Analyzed	CD90
Column B	Tom+ Day 2
vs.	vs.
Column A	CD45-
Unpaired t test
P value	<0.0001
P value summary	****
Significantly different (P < 0.05)?	Yes
One- or two-tailed P value?	Two-tailed
t, df	t=5.357, df=24
How big is the difference?
Mean of column A	26.1
Mean of column B	56.2
Difference between means (B - A) ± SEM	30.10 ± 5.619
95% confidence interval	18.50 to 41.70
R squared (eta squared)	0.5446
F test to compare variances
F, DFn, Dfd	1.653, 12, 12
P value	0.3963
P value summary	ns
Significantly different (P < 0.05)?	No
Table Analyzed	PDGFRa
Column B	Tom+ Day 2
vs.	vs.
Column A	CD45-
Unpaired t test
P value	0.0427
P value summary	*
Significantly different (P < 0.05)?	Yes
One- or two-tailed P value?	Two-tailed
t, df	t=2.141, df=24
How big is the difference?
Mean of column A	21.45
Mean of column B	29.34
Difference between means (B - A) ± SEM	7.881 ± 3.682
95% confidence interval	0.2823 to 15.48
R squared (eta squared)	0.1603
F test to compare variances
F, DFn, Dfd	1.014, 12, 12
P value	0.981
P value summary	ns
Significantly different (P < 0.05)?	No
Table Analyzed	PDGFRb
Column B	Tom+ Day 2
vs.	vs.
Column A	CD45-
Unpaired t test
P value	0.0056
P value summary	**
Significantly different (P < 0.05)?	Yes
One- or two-tailed P value?	Two-tailed
t, df	t=4.220, df=6
How big is the difference?
Mean of column A	21.1
Mean of column B	34
Difference between means (B - A) ± SEM	12.90 ± 3.057
95% confidence interval	5.419 to 20.38
R squared (eta squared)	0.7479
F test to compare variances
F, DFn, Dfd	3.757, 3, 3
P value	0.3058
P value summary	ns
Significantly different (P < 0.05)?	No

## Sheet: Figure 2F
Marker expression (%) in CD45- SMA-Tom+ population - Endosteum
	CD45-			Tom+ Day 2			t-test (2-tailed, unpaired)
	Mean	SD	n	Mean	SD	n	p value
Sca1	0.693	0.856	11	7.2	7.25	11	0.0078
CD51	15.133	4.837	7	59.66	21.53	7	0.0002
CD105	41.069	28.78	5	16.7	11.78	5	0.1178
CD90	1.658	1.247	8	56.84	15.04	8	<0.0001
PDGFRα	0.796	0.789	7	8.78	7.71	7	0.0184
PDGFRβ	0.119	0.148	4	3.4	0.57	4	<0.0001

## Sheet: Figure 2G
Marker expression in SMA-Tom periosteal population at different time points
	Tom+ Day 2			Tom+ Day 14			Tom+ Day 42			Tom+ Day 90
	Mean	SD	n	Mean	SD	n	Mean	SD	n	Mean	SD	n
Sca1	23.4171	8.72095	7	16.2	4.426	2	17.515	2.793	2	23.0225	7.75419	4
CD51	58.5143	10.3251	7	55.5	7.92	2	54.95	9.122	2	46.275	7.59534	4
CD105	10.4414	7.21351	7	12.135	2.468	2	11.97	3.154	2	8.2225	4.62273	4
CD90	63.4171	12.2697	7	54.345	4.179	2	57.65	3.041	2	74.4075	4.95717	4

## Sheet: Figure 2 S2A
CFU-F formation in different periosteal populations
CFU/1000 sorted cells
CD45-	Sca1+ CD51-	Sca1+ CD51+	Sca1- CD51+	Sca1- CD51-	CD90+ CD105-	CD105+ CD90-	CD90- CD105-
12.6667	17.2911	100	56.6667	0	121.212	3.33333	20.8333
23.3333	0.983768	57.4572	65.8333	0	71.4286	1.66667	20.8333
21.3333	0	181.219	90.8333	0	43.1894	0	10.8333
	0	132	60.8333	0
Table Analyzed		CFU-F
Data sets analyzed		A-H
ANOVA summary
F		11.68
P value		<0.0001
P value summary		****
Significant diff. among means (P < 0.05)?		Yes
R square		0.8034
Brown-Forsythe test
F (DFn, DFd)		3.534 (7, 20)
P value		0.0124
P value summary		*
Are SDs significantly different (P < 0.05)?		Yes
Dunnett's multiple comparisons test	Mean Diff.	95.00% CI of diff.	Significant?	Summary
CD45- vs. Sca1+ CD51-	14.54	-39.34 to 68.43	No	ns
CD45- vs. Sca1+ CD51+	-98.56	-152.4 to -44.67	Yes	***
CD45- vs. Sca1- CD51+	-49.43	-103.3 to 4.456	No	ns
CD45- vs. Sca1- CD51-	19.11	-34.78 to 73.00	No	ns
CD45- vs. CD90+ CD105-	-59.5	-117.1 to -1.892	Yes	*
CD45- vs. CD105+ CD90-	17.44	-40.16 to 75.05	No	ns
CD45- vs. CD90- CD105-	1.611	-56.00 to 59.22	No	ns

## Sheet: Figure 2 S2C
Proportion of colonies differentiating into different cell types
	Sca1+ CD51+				Sca1- CD51+				CD90+ CD105-				CD90- CD105-
Osteogenic	0.28877	0.122449	0.290909	0.25	0.980583	0.985294	0.989848	1	0.083333	0.555556	0.384615		0.97619	0.967742	1
Mixed	0.545455	0.632653	0.272727	0.277778	0.009709	0.007353	0.010152	0	0.375	0.288889	0.076923		0.02381	0	0.032258
Adipogenic	0.165775	0.244898	0.436364	0.472222	0.009709	0.007353	0	0	0.333333	0.155556	0.230769		0	0	0

## Sheet: Figure 2 S2D
% SMA-Tom+ cells in diferent populations (note that values within a row are from the same sample)
CD45-	CD51- Sca1+	CD51+ Sca1+	CD51+ Sca1-	CD51- Sca1-	CD105- CD90+	CD105+ CD90-	CD105- CD90-
1.66	0.55	2.6	1.96	0.83
1.27	0.29	1.56	1.53	0.9
1.09	0.68	2.08	1.21	0.33
2.27	0.74	3.32	2.27	1.56
5.41	0.75	5.36	10.55	1.35	13.15	1.95	3.08
3.25	0.81	2.05	6.42	1.64	10.2	0.85	1.82
4.46	0.98	2.94	7.15	2.56	10.9	2.15	3.08
2.25	2.01	4.02	3.31	0.79	8.94	1.31	1.38
1.84	0.65	3.48	4.07	0.59	12.5	0.85	1.25
7.12	3.1	4.39	16.2	8.7
6.36	1.92	5.16	17.1	5.04
3.32	1.11	4.1	4.28	2.76	9.52	1.85	2.17
2.26	0.77	3.89	3.44	1.74	12.7	0.69	1.16
3.64	1.39	7.49	9.2	0.99	6.64	3.17	1.01
1.88	0.71	5.13	6.26	0.74	2.85	3.53	0.84
4.24	1.67	16.8	8.73	1.57	8.77	1.11	1.21
