# Supplementary material for: Heterogeneity of murine periosteum progenitors involved in fracture healing
Source: eLife. 2021 Feb 9;10:e58534. doi: 10.7554/eLife.58534 (PMC7906599; doi:10.7554/eLife.58534)
Supplement: Figure 3—source data 1. [file elife-58534-fig3-data1.xlsx]

## Sheet: Sheet1
Cluster markers
Filtered for AUROC values >0.7 - AUROC is a measure of fit to a particular cluster
Cluster	Symbol	AUROC	Avg_diff	Gene name
1	Gsn	0.737107	1.6051	Gelsolin
2	Tnmd	0.932657	2.87338	Tenomodulin
2	Thbs4	0.922763	2.40401	Thrombospondin 4
2	Fmod	0.897555	2.04195	Fibromodulin
2	Cpxm2	0.876981	2.77393	Carboxypeptidase X 2
2	Mgp	0.853675	1.52478	Matrix gla protein
2	Col1a2	0.853483	1.06047	Collagen I alpha 2
2	Cilp	0.811052	1.85006	Cartilage intermediate layer protein, nucleotide pyrophosphohydrolase
2	Ogn	0.808696	1.66171	Osteoglycin
2	Serpinf1	0.793714	1.16758	Serine (or cysteine peptidase inhibitor, clade F, member 1 (PEDF)
2	Col11a1	0.718309	1.03611	Collagen type XI alpha 1
2	Abi3bp	0.71529	1.36287	ABI gene family member 3 (NESH) binding protein
3	Rgs5	0.92594	3.16484	Regulator of G-protein signaling 5
3	Fabp4	0.836358	3.44501	Fatty acid binding protein 4, adipocyte
3	Cd36	0.761153	2.23522	CD36
3	Epas1	0.715343	1.43232	Endothelial PAS domain protein 1
3	Timp3	0.712875	1.08883	Tissue inhibitor of metalloproteinase 3
3	Cxcl12	0.7067	1.17355	Chemokine CXC ligand 12
4	Acta1	0.999312	4.39419	Acta, alpha 1, skeletal muscle
4	Slc25a4	0.90224	2.53836	Solute carrier family 5 (mitochondrial carrier, adenine nucleotide translocator), member 4
4	Tcap	0.899564	3.17581	Titin-cap
4	Tpm2	0.883583	2.61318	Teneurin transmembrane protein 1
4	Cox6a2	0.883468	2.62186	Cytochrome c oxidase subunit 6A2
4	Myl1	0.882627	3.39811	Myosin, light polypeptide 1
4	Tnnc2	0.879645	3.75917	Troponin C2, fast skeletal type
4	Mb	0.876969	3.43404	Myoglobin
4	Tnni2	0.863205	3.25288	Troponin I, skeletal, fast 2
4	Ckm	0.859879	2.72387	Creatine kinase, muscle
4	Cox8b	0.843325	2.87156	Cytochrome c oxidase subunit 8B
4	Mylpf	0.837896	4.37693	Myosin light chain, phosphorylatable, fast skeletal muscle
4	Cox7b	0.830173	2.04513	Cytochrome c oxidase subunit 7B
4	Aldoa	0.826044	2.33321	Aldolase A, fructose-bisphosphate
4	Cryab	0.797599	2.39653	Crystallin, alpha B
4	Atp5e	0.792361	1.51657	ATP synthase, H+ transporting, mitochondrial F1 complex, epsilon subunit
4	Tpm1	0.784753	2.41735	Tropomyosin 1, alpha
4	Chchd10	0.783568	2.2767	Coiled-coil-helix-coiled-coil-helix domain containing 10
4	Thsd7b	0.77531	1.90091	Thrombospondin, type I, domain containing 7B
4	Cox7a1	0.765331	2.22358	Cytochrome c oxidase subunit 7A1
4	Cox7c	0.754932	1.46245	Cytochrome c oxidase subunit 7C
4	Gm12338	0.74568	1.409	Cytochrome c oxidase, subunit VIIc pseudogene
4	Tnnt3	0.745527	2.47904	Troponin T3, skeletal, fast
4	BC037032	0.733484	1.69261
4	Des	0.728322	1.84558	Desmin
4	Eno3	0.727175	2.26158	Enolase 3, beta muscle
4	Cox5a	0.726105	1.43148	Cytochrome c oxidase subunit 5A
4	Atp2a1	0.72534	1.15946	ATPase, Ca++ transporting, cardiac muscle, fast twitch 1
4	Uqcrb	0.719529	1.41786	Ubiquinol-cytochrome c reductase binding protein
4	Atp5k	0.717464	1.57891	ATP synthase, H+ transporting, mitochondrial F1F0 complex, subunit E
4	Uqcrq	0.7154	1.85438	Ubiquinol-cytochrome c reductase, complex III subunit VII
4	Atp5g1	0.705383	1.95	ATP synthase, H+ transporting, mitochondrial F0 complex, subunit C1 (subunit 9)
4	Uqcr11	0.702898	1.18164	Ubiquinol-cytochrome c reductase, complex III subunit XI
