# Supplementary material for: Heterogeneity of murine periosteum progenitors involved in fracture healing
Source: eLife. 2021 Feb 9;10:e58534. doi: 10.7554/eLife.58534 (PMC7906599; doi:10.7554/eLife.58534)
Supplement: Figure 4—source data 1. [file elife-58534-fig4-data1.xlsx]

## Sheet: Figure 4F-G
Periosteum - Figure 4F											Endosteum - Figure 4G
	GFP-			GFPint			GFPhi					GFP-			GFPint			GFPhi
	Mean	SD	n	Mean	SD	n	Mean	SD	n			Mean	SD	n	Mean	SD	n	Mean	SD	n
Sca1	10.9	7.724	19	50.76	15.93	19	46.59	14.21	19		Sca1	1.012	1.109	19	7.842	7.037	19	5.828	5.875	19
CD51	30.53	26.01	19	76.03	14.02	19	80.19	11.03	19		CD51	8.142	6.893	19	70.3	21.25	19	72.44	21.89	19
CD90	33.47	18.41	19	57.06	12.87	19	49.79	12.37	19		CD90	4.183	4.342	19	17.03	10.33	19	17.51	11.5	19
CD105	28.43	17.95	19	11.54	6.175	19	7.519	5.678	19		CD105	61.7	9.903	19	9.776	6.41	19	7.883	6.777	19
Statistical tests (performed on each marker individually, Graphpad Prism)											Statistical tests (performed on each marker individually)
Table Analyzed			Sca1 peri								Table Analyzed			Sca1 endo
Repeated measures ANOVA summary											Repeated measures ANOVA summary
Assume sphericity?			No								Assume sphericity?			No
F			62.05								F			18.56
P value			<0.0001								P value			0.0002
P value summary			****								P value summary			***
Statistically significant (P < 0.05)?			Yes								Statistically significant (P < 0.05)?			Yes
Geisser-Greenhouse's epsilon			0.8249								Geisser-Greenhouse's epsilon			0.5692
R square			0.7751								R square			0.5076
Was the matching effective?											Was the matching effective?
F			1.507								F			4.762
P value			0.1446								P value			<0.0001
P value summary			ns								P value summary			****
Is there significant matching (P < 0.05)?			No								Is there significant matching (P < 0.05)?			Yes
R square			0.1449								R square			0.5397
Dunnett's multiple comparisons test	Mean Diff.	95.00% CI of diff.	Significant?	Summary	Adjusted P Value						Dunnett's multiple comparisons test	Mean Diff.	95.00% CI of diff.	Significant?	Summary	Adjusted P Value
GFP- vs. GFPint	-39.85	-50.17 to -29.54	Yes	****	<0.0001						GFP- vs. GFPint	-6.829	-10.38 to -3.276	Yes	***	0.0004
GFP- vs. GFPhi	-35.69	-42.63 to -28.75	Yes	****	<0.0001						GFP- vs. GFPhi	-4.816	-7.805 to -1.826	Yes	**	0.0022
Table Analyzed			CD51 peri								Table Analyzed			CD51 endo
Repeated measures ANOVA summary											Repeated measures ANOVA summary
Assume sphericity?			No								Assume sphericity?			No
F			126								F			221.3
P value			<0.0001								P value			<0.0001
P value summary			****								P value summary			****
Statistically significant (P < 0.05)?			Yes								Statistically significant (P < 0.05)?			Yes
Geisser-Greenhouse's epsilon			0.5558								Geisser-Greenhouse's epsilon			0.6781
R square			0.875								R square			0.9248
Was the matching effective?											Was the matching effective?
F			6.694								F			6.545
P value			<0.0001								P value			<0.0001
P value summary			****								P value summary			****
Is there significant matching (P < 0.05)?			Yes								Is there significant matching (P < 0.05)?			Yes
R square			0.295								R square			0.1975
Dunnett's multiple comparisons test	Mean Diff.	95.00% CI of diff.	Significant?	Summary	Adjusted P Value						Dunnett's multiple comparisons test	Mean Diff.	95.00% CI of diff.	Significant?	Summary	Adjusted P Value
GFP- vs. GFPint	-45.5	-55.37 to -35.62	Yes	****	<0.0001						GFP- vs. GFPint	-62.16	-71.60 to -52.71	Yes	****	<0.0001
GFP- vs. GFPhi	-49.66	-59.81 to -39.51	Yes	****	<0.0001						GFP- vs. GFPhi	-64.3	-74.15 to -54.44	Yes	****	<0.0001
Table Analyzed			CD90 peri								Table Analyzed			CD90 endo
Repeated measures ANOVA summary											Repeated measures ANOVA summary
Assume sphericity?			No								Assume sphericity?			No
F			40.46								F			39.95
P value			<0.0001								P value			<0.0001
P value summary			****								P value summary			****
Statistically significant (P < 0.05)?			Yes								Statistically significant (P < 0.05)?			Yes
Geisser-Greenhouse's epsilon			0.5586								Geisser-Greenhouse's epsilon			0.7759
R square			0.6921								R square			0.6894
Was the matching effective?											Was the matching effective?
F			7.598								F			7.483
P value			<0.0001								P value			<0.0001
P value summary			****								P value summary			****
Is there significant matching (P < 0.05)?			Yes								Is there significant matching (P < 0.05)?			Yes
R square			0.5391								R square			0.5375
Dunnett's multiple comparisons test	Mean Diff.	95.00% CI of diff.	Significant?	Summary	Adjusted P Value						Dunnett's multiple comparisons test	Mean Diff.	95.00% CI of diff.	Significant?	Summary	Adjusted P Value
GFP- vs. GFPint	-23.59	-31.27 to -15.90	Yes	****	<0.0001						GFP- vs. GFPint	-12.85	-17.10 to -8.596	Yes	****	<0.0001
GFP- vs. GFPhi	-16.32	-24.12 to -8.519	Yes	***	0.0002						GFP- vs. GFPhi	-13.33	-18.14 to -8.513	Yes	****	<0.0001
Table Analyzed			CD105 peri								Table Analyzed			CD105 endo
Repeated measures ANOVA summary											Repeated measures ANOVA summary
Assume sphericity?			No								Assume sphericity?			No
F			30.19								F			590.8
P value			<0.0001								P value			<0.0001
P value summary			****								P value summary			****
Statistically significant (P < 0.05)?			Yes								Statistically significant (P < 0.05)?			Yes
Geisser-Greenhouse's epsilon			0.5272								Geisser-Greenhouse's epsilon			0.6415
R square			0.6265								R square			0.9704
Was the matching effective?											Was the matching effective?
F			3.063								F			4.17
P value			0.0021								P value			0.0001
P value summary			**								P value summary			***
Is there significant matching (P < 0.05)?			Yes								Is there significant matching (P < 0.05)?			Yes
R square			0.3639								R square			0.05806
Dunnett's multiple comparisons test	Mean Diff.	95.00% CI of diff.	Significant?	Summary	Adjusted P Value						Dunnett's multiple comparisons test	Mean Diff.	95.00% CI of diff.	Significant?	Summary	Adjusted P Value
GFP- vs. GFPint	16.89	8.374 to 25.41	Yes	***	0.0003						GFP- vs. GFPint	51.93	47.22 to 56.63	Yes	****	<0.0001
GFP- vs. GFPhi	20.91	12.81 to 29.01	Yes	****	<0.0001						GFP- vs. GFPhi	53.82	48.58 to 59.05	Yes	****	<0.0001
