# Supplementary material for: Heterogeneity of murine periosteum progenitors involved in fracture healing
Source: eLife. 2021 Feb 9;10:e58534. doi: 10.7554/eLife.58534 (PMC7906599; doi:10.7554/eLife.58534)
Supplement: Figure 5—source data 1. [file elife-58534-fig5-data1.xlsx]

## Sheet: Figure 5A
Figure 5A	Expression of markers on Col2.3GFP+ osteoblasts in different tissues
	Periosteum			Endosteum
	Mean (%)	SD	n	Mean	SD	n
Sca1	6.5	5.7	10	0.6	0.7	24
CD51	71.5	21.6	13	36.9	18.2	32
CD105	18.7	11.6	13	13	7	32
CD90	32	20.4	12	3.3	5.5	28
PDGFRα	13.3	11	7	0.2	0.1	4
CD200	90.93	4.14	6	93.31	6.45	8
Ly51	38.72	16.44	9	9.93	8.1	28

## Sheet: Figure 5B
% of SSC population in different tissue compartments/cell populations
	CD45- Periosteum								CD45- Endosteum								Col2.3GFP+ Periosteum								Col2.3GFP+ Endosteum								CD45- Bone marrow
BCSP	1.29	2.11	6.67	3.52	2.25	2.45	2.49	1.82	0.29	0.61	0.61	0.41	0.2	0.21	0.3	0.84	4	4.63		12.63		5.85	4.23	2.8	3.18	5.03	11.15	5.04	0.81	2.29	0	0	1.44	0.7	0.28	1.75	1.41	1.68	1.37	0.51	0.63	0.42	0.24	1.04
Pre-BCSP	7.06	8.52	25.59	25.36	2.22	3.13	5.94	6.57	0.32	0.66	0.21	0.16	20.69	3.85	0.11	3.44	1.54	1.18	0.74	4.21		1.46	0.94	0.4	0.27	0.35	0.36	0	0	0.12	0	0	2.77	0.9	0.54	6	4.44	2.64	1.38	1.22	1.26	3.3	0.89	5.23
SSC CD200+	8.14	9.89	12.03	9.76	2.62	2.96	5.3	4.6	1.48	1.74	0.96	1.58	0.53	1.06	1.48	1.62	23.08	16.73	29.41	21.05		31.22	26.76	12.8	32.89	30.9	34.17	25.21	29.73	34.61	41.35	43.18	0.63	0.79	0.48	0.09	0.03	0.11	0.11	0.8	1.33	1.61	1.65	0.93

## Sheet: Figure 5C-D
% Col2.3GFP+ cells within each 'stem cell' population
	Periosteum						Endosteum
BCSP	15.1	9.34	4.98	4.26		2.49	17.4	14.6	15.4	12.2	19.4	40
Pre-BCSP	1.06	0.59	0.037	0.2		0.39	1.33	0.93	1.18	1.34	1.92	0
SSC CD200+	15.1	7.24	3.31	2.55		10.9	36.4	33.9	37.8	34.4	38.6	50.4
	Periosteum			Endosteum
BCSP	7.234	5.06804	5	19.8333	10.1795	6
Pre-BCSP	0.4554	0.396303	5	1.11667	0.636637	6
SSC CD200+	7.82	5.26627	5	38.5833	6.07369	6
