# Supplementary material for: Heterogeneity of murine periosteum progenitors involved in fracture healing
Source: eLife. 2021 Feb 9;10:e58534. doi: 10.7554/eLife.58534 (PMC7906599; doi:10.7554/eLife.58534)
Supplement: Figure 6—source data 1. [file elife-58534-fig6-data1.xlsx]

## Sheet: Figure 6I
SMA-Tomato+ contribution to osteoblasts in secondary fracture (%)
D0	D-14
19.68	6.61
32.6	5.75
14.74	19.88
8.46	26.72
16.1	4.7
37.28	18.68
22.51
27.89
29.99
42.19
14.52
Table Analyzed	Osteoblasts
Column B	D-14
vs.	vs.
Column A	D0
Unpaired t test
P value	0.0616
P value summary	ns
Significantly different (P < 0.05)?	No
One- or two-tailed P value?	Two-tailed
t, df	t=2.020, df=15

## Sheet: Figure 6J
SMA-Tomato+ contribution to chondrocytes in secondary fracture (%)
D0	D-14
5.84	12.79
5.86	7.9
6.63	7.21
14.45	8.84
22.35	3.22
50.93	14.12
24.09
10.9
13.95
17.19
16.25
Table Analyzed	Chondrocytes
Column B	D-14
vs.	vs.
Column A	D0
Unpaired t test
P value	0.1558
P value summary	ns
Significantly different (P < 0.05)?	No
One- or two-tailed P value?	Two-tailed
t, df	t=1.494, df=15
