# Supplementary material for: Heterogeneity of murine periosteum progenitors involved in fracture healing
Source: eLife. 2021 Feb 9;10:e58534. doi: 10.7554/eLife.58534 (PMC7906599; doi:10.7554/eLife.58534)
Supplement: Figure 7—source data 1. [file elife-58534-fig7-data1.xlsx]

## Sheet: Figure 7C
Day 14 histological analysis
Callus area (mm^2)				Mineralised area (mm^2)
Control	DTA 0-1			Control	DTA 0-1
3.15	4.415			1.168	0.718
10.794	1.44			2.69	0.363
6.821	5.017			1.403	0.771
10.526	6.48			2.895	0.946
	5.138				0.721
	2.975				0.657
	0.81				0.258
Table Analyzed	Callus area			Table Analyzed	Mineralised area
Column B	DTA 0-1			Column B	DTA 0-1
vs.	vs.			vs.	vs.
Column A	Control			Column A	Control
Unpaired t test				Unpaired t test
P value	0.0389			P value	0.0026
P value summary	*			P value summary	**
Significantly different (P < 0.05)?	Yes			Significantly different (P < 0.05)?	Yes
One- or two-tailed P value?	Two-tailed			One- or two-tailed P value?	Two-tailed
t, df	t=2.416, df=9			t, df	t=4.120, df=9

## Sheet: Figure 7E
SMA-DTA microCT fracture analysis Day 14
	Total volume (mm^3)							Bone mass (mg)
	Control	DTA 0-1	DTA 0-8					Control	DTA 0-1	DTA 0-8
M	44.89	28.675	20.212				M	13.725	10.969	8.114
M	35.644	24.181	23.948				M	14.176	10.189	9.439
M	45.696	23.885	25.889				M	16.697	7.969	8.022
M	42.961	19.648	31.578				M	14.656	7.36	8.215
M	26.081						M	10.462
M	29.085						M	11.893
M	37.4297						M	14.148
M	38.5262						M	14.037
F	29.841	18.604	19.511				F	12.213	6.56414	6.97
F	31.653	21.494	18.27				F	12.487	7.13046	8.604
F	21.112	20.169	9.885				F	10.718	7.75725	5.02
F	30.475	12.721	8.2294				F	11.861	6.13219	4.1
F	20.483	10.268					F	9.838	5.54152
F	34.481	26.585					F	12.255	9.03586
Table Analyzed			Total volume				Table Analyzed			Bone mass
Data sets analyzed			A-C				Data sets analyzed			A-C
ANOVA summary							ANOVA summary
F			12.84				F			31.81
P value			0.0001				P value			<0.0001
P value summary			***				P value summary			****
Significant diff. among means (P < 0.05)?			Yes				Significant diff. among means (P < 0.05)?			Yes
R square			0.4696				R square			0.6869
Brown-Forsythe test							Brown-Forsythe test
F (DFn, DFd)			0.7450 (2, 29)				F (DFn, DFd)			0.08144 (2, 29)
P value			0.4836				P value			0.922
P value summary			ns				P value summary			ns
Are SDs significantly different (P < 0.05)?			No				Are SDs significantly different (P < 0.05)?			No
Bartlett's test							Bartlett's test
Bartlett's statistic (corrected)			1.121				Bartlett's statistic (corrected)			0.05649
P value			0.5711				P value			0.9722
P value summary			ns				P value summary			ns
Are SDs significantly different (P < 0.05)?			No				Are SDs significantly different (P < 0.05)?			No
Dunnett's multiple comparisons test	Mean Diff.	95.00% CI of diff.	Significant?	Summary	Adjusted P Value		Dunnett's multiple comparisons test	Mean Diff.	95.00% CI of diff.	Significant?	Summary	Adjusted P Value
Control vs. DTA 0-1	12.83	5.723 to 19.94	Yes	***	0.0004		Cre- vs. DTA 0-1	4.933	3.164 to 6.702	Yes	****	<0.0001
Control vs. DTA 0-8	13.76	6.155 to 21.37	Yes	***	0.0004		Cre- vs. DTA 0-8	5.487	3.593 to 7.381	Yes	****	<0.0001

## Sheet: Figure 7F
SMA-DTA microCT fracture analysis Day 21
Total volume (mm^3)				Bone mass (mg)
Control	DTA 0-4			Control	DTA 0-4
15.4438	20.015			9.8319	9.31561
24.0634	24.6023			13.1347	10.5807
16.3244	11.5548			10.3616	7.12745
21.0929	9.8895			9.78622	6.3868
19.9895	21.8524			11.566	9.25088
15.8514	26.1244			9.51641	10.1594
21.2719	24.3296			12.6676	10.559
19.1732	19.7292			13.2769	9.96329
24.7351	11.3332			13.6315	7.2134
17.0259	9.1709			9.06639	6.74374
19.292	20.9031			9.29854	13.1182
17.4497	25.0486			11.2399	14.0591
20.6884	17.5951			12.2824	8.79421
21.9489	18.2473			11.1243	9.54139
29.7229				11.3044
Table Analyzed	TV sexes pooled 21DPF			Table Analyzed	BV sexes pooled 21DPF
Column B	DTA 0-4			Column B	DTA 0-4
vs.	vs.			vs.	vs.
Column A	Control			Column A	Control
Unpaired t test				Unpaired t test
P value	0.3716			P value	0.0225
P value summary	ns			P value summary	*
Significantly different (P < 0.05)?	No			Significantly different (P < 0.05)?	Yes
One- or two-tailed P value?	Two-tailed			One- or two-tailed P value?	Two-tailed
t, df	t=0.9086, df=27			t, df	t=2.421, df=27
