# Supplementary material for: Heterogeneity of murine periosteum progenitors involved in fracture healing
Source: eLife. 2021 Feb 9;10:e58534. doi: 10.7554/eLife.58534 (PMC7906599; doi:10.7554/eLife.58534)
Supplement: Figure 8—source data 1. [file elife-58534-fig8-data1.xlsx]

## Sheet: Figure 8B
Contribution of Col2.3-Tom cells to Osx+ osteoblasts (%)
No Tam	-3	-14
0.05	8.22	1
2.74	5.66	0.63
0.05	6.91	0.23
0.87	12.82	0.85
0.65	9.63	0.55
0.23	6.63	0.51
	13.63	5.59
	24.2	0.76
	14.21
	9.22
Table Analyzed		Overall contribution to Ob
Data sets analyzed		A-C
ANOVA summary
F		20.79
P value		<0.0001
P value summary		****
Significant diff. among means (P < 0.05)?		Yes
R square		0.6644
Brown-Forsythe test
F (DFn, DFd)		3.186 (2, 21)
P value		0.0619
P value summary		ns
Are SDs significantly different (P < 0.05)?		No
Dunnett's multiple comparisons test	Mean Diff.	95.00% CI of diff.	Significant?	Summary	Adjusted P Value
No Tam vs. -3	-10.35	-14.93 to -5.763	Yes	****	<0.0001
No Tam vs. -14	-0.5	-5.295 to 4.295	No	ns	0.9537
